# Supplementary material
Source: PubMed Central journal article supplement (PMC6755803)
Supplement: supp_RA119.010119_154203_0_supp_371012_pvglgw.pdf [file supp_RA119.010119_154203_0_supp_371012_pvglgw.pdf]

**Supplementary Figures:**

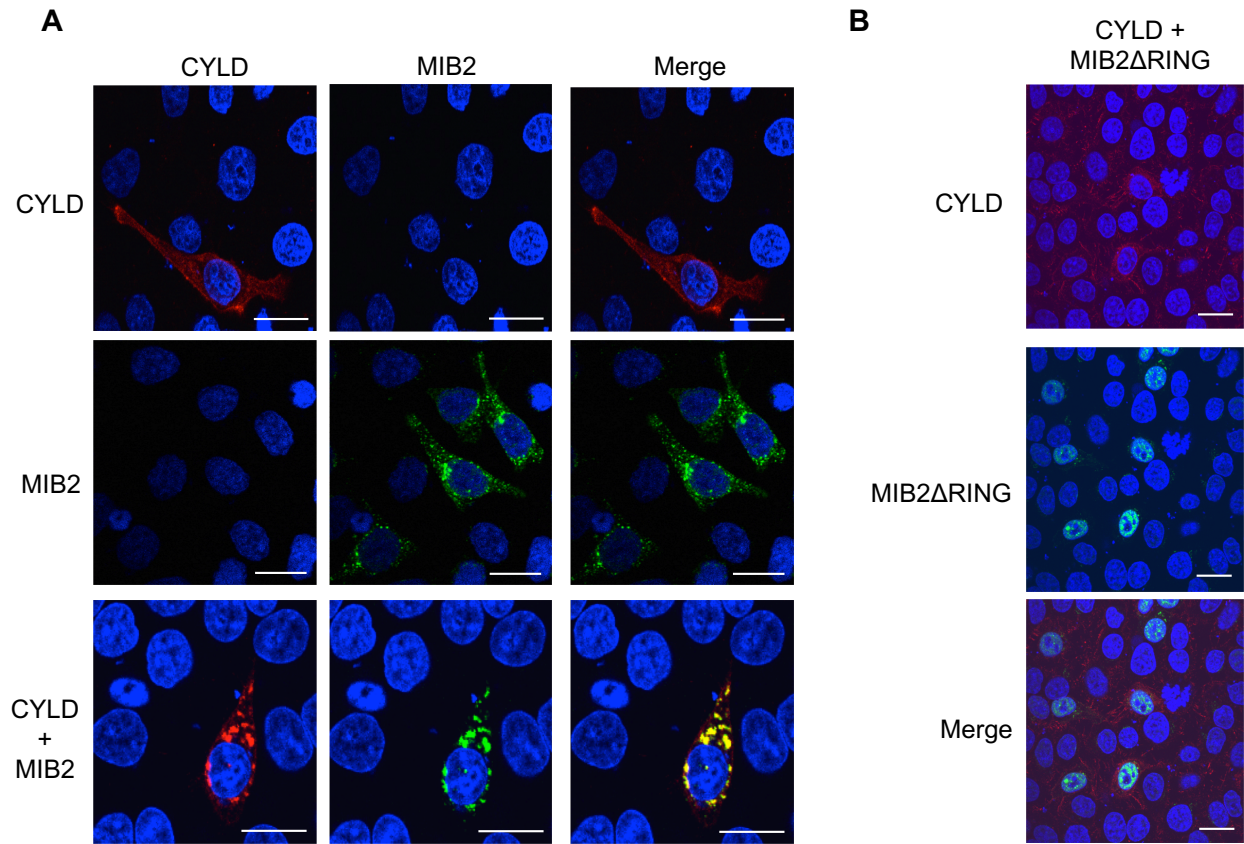

**Figure S1. MIB2 is co-localized with CYLD in the cytoplasm.** (A and B) Immunofluorescent staining of CYLD and MIB2. HeLa cells were co-transfected with the indicated FLAG-tagged CYLD along with V5-tagged wild-type MIB2 (A) or  $\Delta$ RING-MIB2 (B), and immunofluorescent staining was performed using anti-FLAG or anti-V5 antibodies to visualize their intracellular localization. All scale bars denote 20  $\mu$ M.

**A**

| Description          | #PSMs | Score     |               |
|----------------------|-------|-----------|---------------|
| CYLD {CYLD_Human}    | 6     | 169.04    |               |
| Sequence             | #PSMs | Exp Value | Modifications |
| GSSSHNKPkATGSTSDPGNR | 2     | 0.00229   | K9(GG)        |
| kALFVK               | 2     | 0.01021   | K1(GG)        |

**B**

MSSGLWSQEKVTSPLYWEERIFYLLQECVTDKQTQKLLKVPKGSIGQYIQDRSVGHSR  
 IPSAKGKKNQIGLKILEQPHAVLFVDEKDVVEINEKFTELLAITNCEERFSLFKNRNRLSK  
 GLQIDVGCVPVKVQLRSGEEKFPGVVRFRGPLLAERTVSGIFFGVLEEGRGQGFTDGV  
 YQGKQLFQCDEDCGVFVALDKLEIEDDDTALESYAGPGDTMQVELPPLEINRSVSLK  
 VGETIESGTVIFCDVLPKESLGYFVGVDMDNPIGNWDGRFDGVQLCSFACVESTILLHI  
 NDIIPESVTQERRPPKLAFMRSRGVGDGSSSHNKPkATGSTSDPGNRNRSELFYTLNGS  
 SVDSQPQSKSKNTWYIDEVAEDPAKSLTEISTDFDRSSPPLQPPVNSLTENRFHSLPF  
 SLTKMPNTNGSIGHSPLSLSAQSVMEELNTAPVQESPLAMPNGSHGLEVGSLAEVK  
 ENPPFYGVIRWIGQPPGLNEVLAGLELEDECAGCTDGTFRGTRYFTCALkALFVKLKSC  
 RPDSRFASLQPVSNQIERCNSLAFGGYLSEVVEENTPPKMEKEGLEIMIGKKKGIQGHY  
 NSCYLDSTLFLCLFAFSSVLDTVLLRPKEKNDVEYSETQELLRTEIVNPLRIYGYVCATKIM  
 KLRKILEKVEAASGFTSEEKDPPEEFLNLFHHILRVEPLLKIRSAGQKVQDCYFYQIFMEKN  
 EKVGVPYTIQQLLEWSFINSNLKFAEAPSCLIQMPRFGKDFKLFKKIFPSLELNITDLEDT  
 PRQCRICGGLAMYECRECYDDPDISAGKIKQFCKTCNTQVHLHPKRLNHKYNPVSPLK  
 DLPDWDWRHGCIPCQNMELFAVLCIETSHYVAFVKYKDDSAWLFSDMADRGG  
 QNGFNIPQVTPCEVGEYLKMSLEDLHSLDSRRIQGCARRLLCDAYMCMYQSPTMSLY  
 K

**Figure S2. Identification of MIB2-mediated ubiquitination sites in CYLD.** (A) Amino acid sequences identified by MS analysis with di-Gly ubiquitination signature. (B) Amino acid sequence of full-length CYLD. The underlined sequences indicate the amino acid sequences identified by MS analysis.

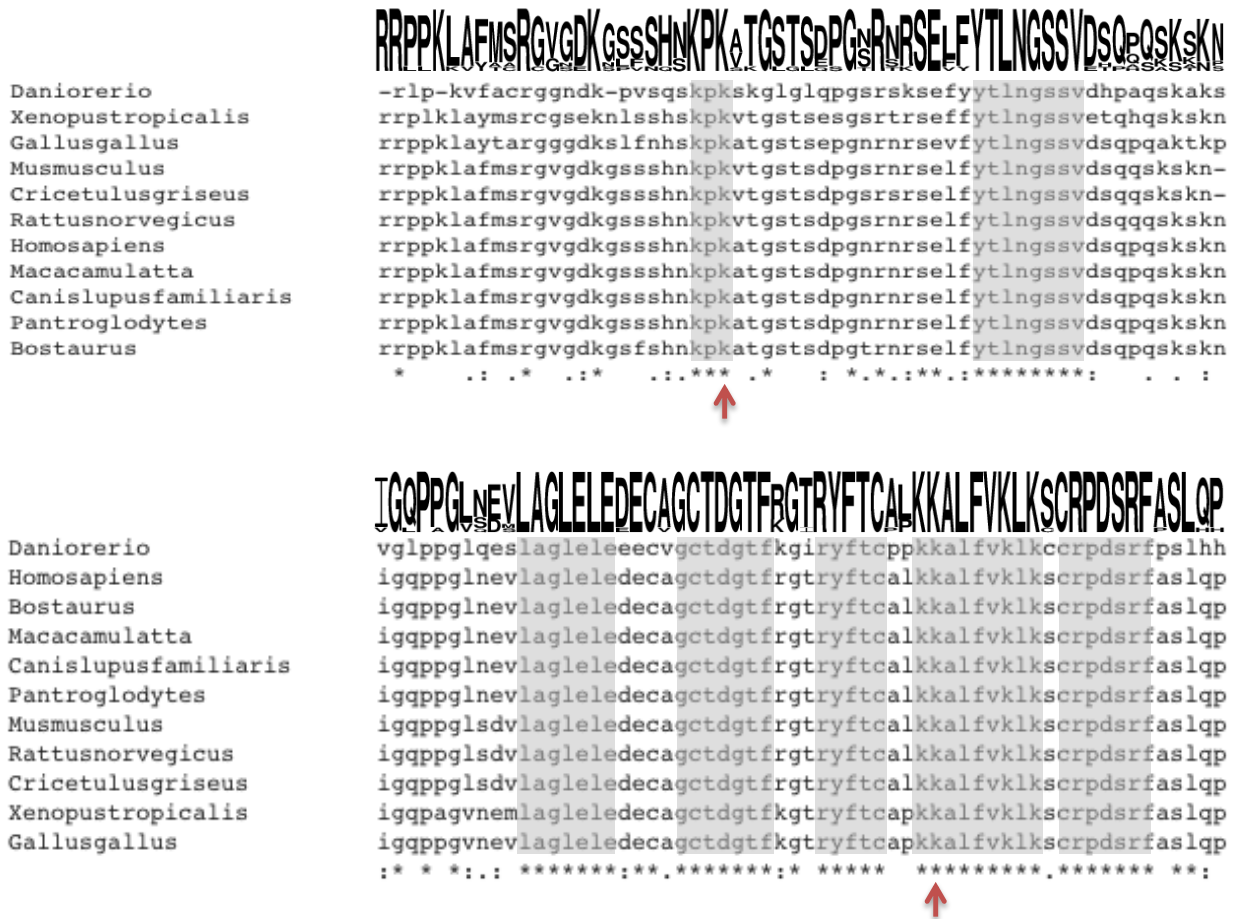

**Figure S3. Multiple-sequence alignment of conserved ubiquitination sites in CYLD orthologs.** The top logos show the conservation of residues. The arrows indicate ubiquitination site of CYLD. Upper and lower panels are sequences around human CYLD-K338 and -K530, respectively.

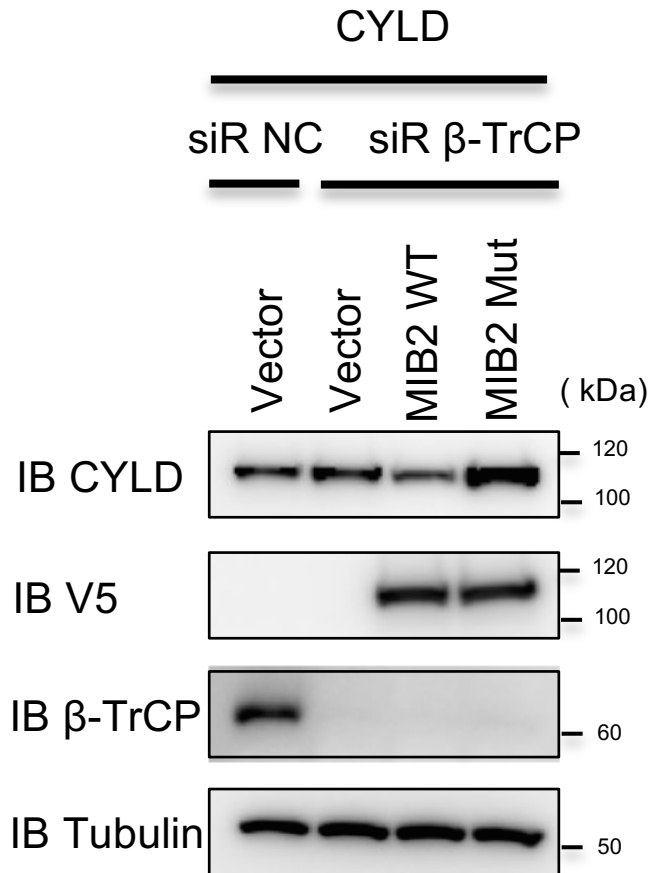

**Figure S4. MIB2 degrades CYLD independently of  $\beta$ -TrCP.** HeLa cells were transfected with an siRNA targeting  $\beta$ -TrCP. Twenty-four hours after transfection, HeLa cells were further transfected with FLAG-tagged CYLD along with V5-tagged WT or Mut MIB2. Control (Vector) was used mock pcDNA3.2 plasmid.

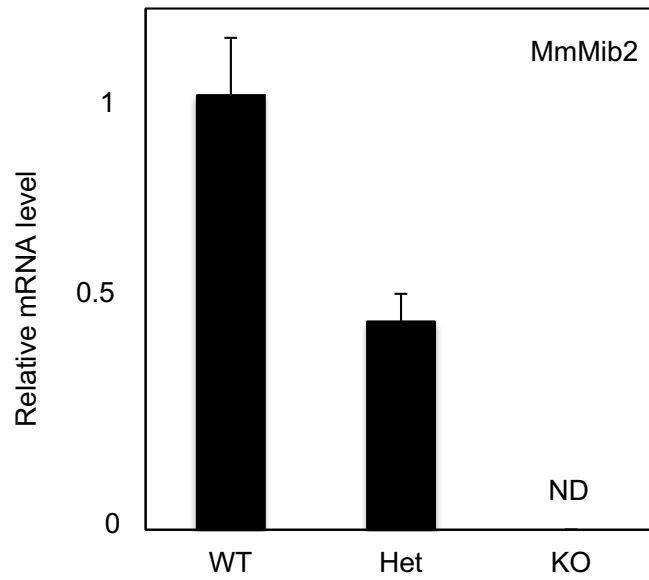

**Figure S5. qPCR analysis of *Mib2* expression in MEF cells.** WT, Het, and KO refer to wild-type, heterozygous and homozygous for the *Mib2* knockout mice, respectively. Relative mRNA levels of *Mib2* are shown by mean  $\pm$  s.e.m. ( $n=3$ ). ND: not detected.

| CYLD mis-sense no. | Codon changes | AA changes | Codon no. | Phenotypes               |
|--------------------|---------------|------------|-----------|--------------------------|
| -                  | TCA-TAA       | Ser-Term   | 371       | Cylindromatosis          |
| -                  | GAA-TAA       | Glu-Term   | 379       | Cylindromatosis          |
| -                  | CAG-TAG       | Gln-Term   | 403       | Cylindromatosis          |
| -                  | TAT-TAA       | Tyr-Term   | 485       | Cylindromatosis          |
| -                  | TAT-TAG       | Tyr-Term   | 485       | Brooke-Spiegler syndrome |
| -                  | TAT-TAG       | Tyr-Term   | 523       | Cylindromatosis          |
| -                  | TTA-TAA       | Leu-Term   | 561       | Trichoepithelioma        |
| 1                  | GGT-GAT       | Gly-Asp    | 596       | Trichoepithelioma        |
| 2                  | GTG-GAG       | Val-Glu    | 654       | Brooke-Spiegler syndrome |
| 3                  | GAT-GGT       | Asp-Gly    | 681       | Trichoepithelioma        |
| 4                  | AGA-ACA       | Arg-Thr    | 703       | Brooke-Spiegler syndrome |
| -                  | CAA-TAA       | Gln-Term   | 707       | Brooke-Spiegler syndrome |
| -                  | CAA-TAA       | Gln-Term   | 710       | Trichoepithelioma        |
| 5                  | GAG-GGG       | Glu-Gly    | 747       | Brooke-Spiegler syndrome |
| CYLD mis-sense no. | Codon changes | AA changes | Codon no. | Phenotypes               |
| -                  | CGA-TGA       | Arg-Term   | 758       | Cylindromatosis          |
| -                  | AAA-TAA       | Lys-Term   | 767       | Brooke-Spiegler syndrome |
| 6                  | GAT-AAT       | Asp-Asn    | 779       | Trichoepithelioma        |
| -                  | TTA-TGA       | Lue-Term   | 780       | Trichoepithelioma        |
| -                  | TAC-TAG       | Tyr-Term   | 803       | Trichoepithelioma        |
| -                  | CAA-TAA       | Gln-Term   | 823       | Cylindromatosis          |
| -                  | TTA-TAA       | Trp-Term   | 849       | Cylindromatosis          |
| -                  | TGG-TAG       | Gln-Term   | 857       | Cylindromatosis          |
| -                  | GAA-TAA       | Glu-Term   | 868       | Cylindromatosis          |
| -                  | TGG-TGA       | Trp-Term   | 885       | Cylindromatosis          |
| 7                  | GGT-GCT       | Gly-Ala    | 896       | Trichoepithelioma        |
| 8                  | CCT-CTT       | Pro-Leu    | 904       | Trichoepithelioma        |
| -                  | CGA-TGA       | Arg-Term   | 936       | Cylindromatosis          |
| 9                  | GAT-GTT       | Asp-Val    | 941       | Trichoepithelioma        |

**Figure S6. Nineteen nonsense and 9 missense mutations in *CYLD* related to Brooke-Spiegler Syndrome, familial cylindromatosis and multiple familial trichoepitheliomas.**

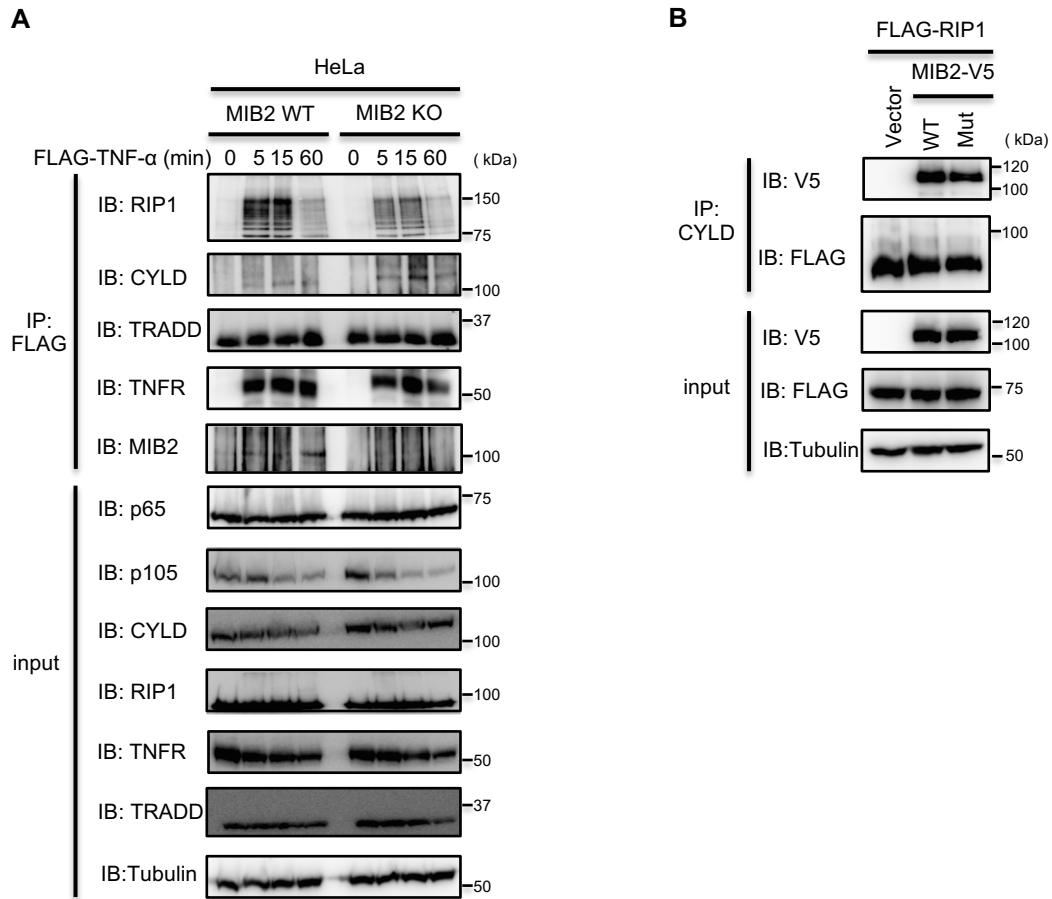

**Figure S7. MIB2 and CYLD are recruited to TNFR signaling complex I.** (A) Analysis of TNF-RSC in *MIB2*-deficient cells. Wild-type (*MIB2*-WT) and *MIB2*-deficient (*MIB2*-KO) HeLa cells were stimulated with FLAG-tagged TNF- $\alpha$  for the indicated times. Following this, the TNF-RSC was examined by immunoprecipitation with an anti-FLAG antibody and immunoblotting of the immunoprecipitates with the indicated antibodies. (B) Analysis of RIP1-MIB2 interaction in cells. Immunoprecipitation using an anti-CYLD antibody was performed on extracts of HEK293T cells transfected with FLAG-tagged RIP1 and either V5-tagged WT or Mut MIB2. Each protein in the immunoprecipitate was evaluated by immunoblotting with the respective antibodies. Control (Vector) was used mock pcDNA3.2.
